# Supplementary material for: Mutual inhibition of insulin signaling and PHLPP-1 determines cardioprotective efficiency of Akt in aged heart
Source: publisher site journal article supplement (doi:10.18632/aging.100933), 2016-03-27
Supplement: Supplementary file [file aging-v8i5-100933-supplementary-material-SD1.pdf]

## SUPPLEMENTARY DATA

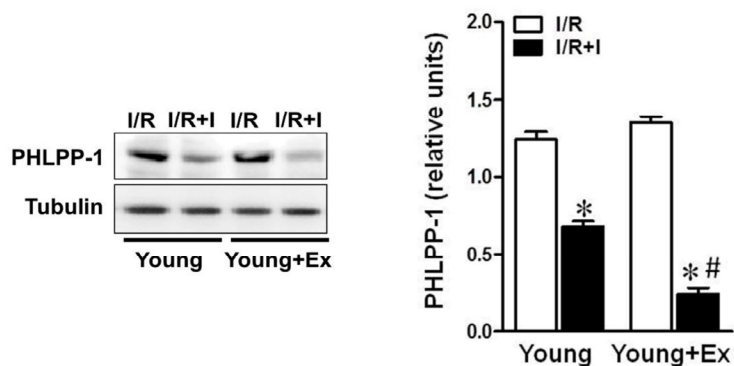

**Figure S1. Insulin downregulates PHLPP-1 level in young hearts.** Young rats were experienced exercise training for 10 weeks. Trained or untrained young hearts were subjected to *in vivo* ischemia and reperfusion. Quantification of PHLPP-1 immunoblots results shown that PHLPP-1 protein level in trained young group (young+Ex) showed no significant change comparing with untrained young group (young). But, administration of insulin during reperfusion, protein level of PHLPP-1 was markedly downregulated in untrained young group and further downregulated in exercise trained young group. Values are mean  $\pm$  S.E., n=5 per group. \* $P < 0.05$  vs. Young+I/R; # $P < 0.05$  vs. Young+Ex+I/R.
